# Supplementary material
Source: PubMed Central journal article supplement (PMC4806660)

SUPPLEMENTARY DATA

**Supplementary Figure S1. Proinsulin keep mutants and lose mutants are synthesized at rates comparable to that of wild-type proinsulin.** INS1 cells were transiently transfected to express myc-tagged proinsulin ('wt'), or keep mutants or lose mutants as indicated. The methionine content of each of these constructs is identical. At 48 h, cells were labeled with pure <sup>35</sup>S-Met for 15 min, lysed, immunoprecipitated with anti-myc, and analyzed by reducing Bis-Tris 4-12% polyacrylamide gradient gel electrophoresis and phosphorimaging (upper panel). The synthesis of proinsulin was quantified by scanning densitometry and ImageJ; the numbers in white reflect independent replicates, and no statistically significant differences were observed.

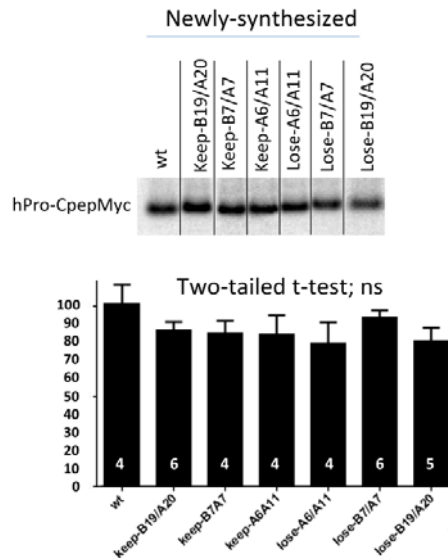

**Supplementary Figure S2. Schematic of potential cysteine interlopers that may lure natural disulfide partners into disulfide mispairing.**

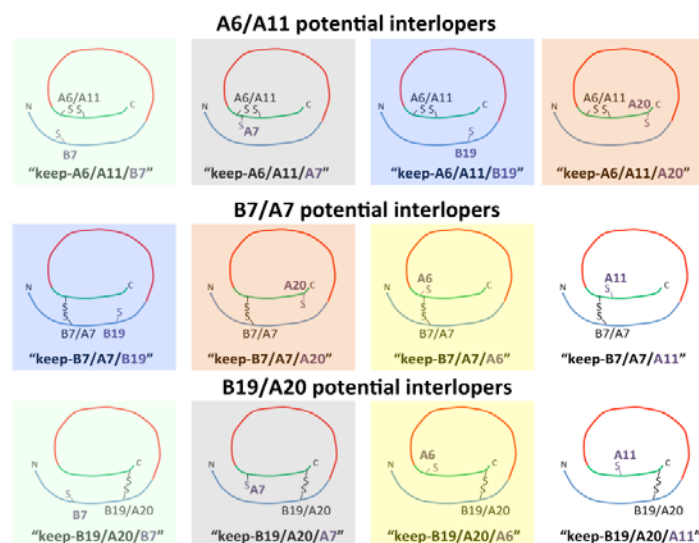

SUPPLEMENTARY DATA

**Supplementary Figure S3. Effect of MIDY mutations on the secretion of proinsulin lose-A6/A11.** 293T cells were transfected with myc-tagged proinsulin ('WT'), or the indicated constructs, or untransfected ('Control'). At 30 h post-transfection, both cells and overnight culture media were collected and analyzed by Western blotting as in Fig. 2A.

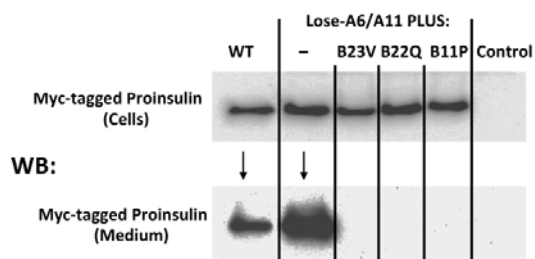

Supplement: supp_db15-1345_DB151345SupplementaryData.pdf [file supp_db15-1345_DB151345SupplementaryData.pdf]
